# Supplementary material for: Initial stage of atomic layer deposition of 2D-MoS2 on a SiO2 surface: a DFT study
Source: Royal Society of Chemistry journal article supplement (doi:10.1039/c8cp00210j), 2018-01-01
Supplement: c8cp00210j1.pdf [file c8cp00210j1.pdf]

# Initial stage of atomic layer deposition of 2D-MoS<sub>2</sub> on SiO<sub>2</sub> surface: a DFT study

M. Shirazi, W. M. M. Kessels, and A. A. Bol\*.

Department of Applied Physics, Eindhoven University of Technology, P.O. Box 513, 5600 MB Eindhoven, The Netherlands.

Supporting information (SI) contains two figures and two tables.

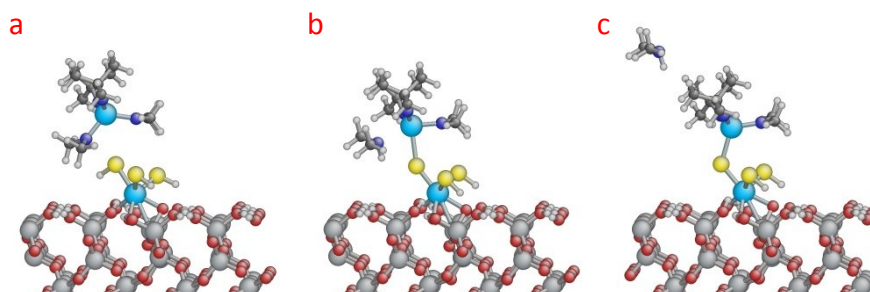

Figure S1. Introduction of  $\text{Mo}(\text{NMe}_2)_2(\text{N}^t\text{Bu})_2$  precursor to the formed SH groups at the fully hydroxylated  $\text{SiO}_2$  (0001) surface. These reactive sites are formed in previous cycles of ALD which perform as nucleation sites in the metal pulse of ALD. Here, only reaction energies of formation and desorption of dimethylamine are calculated which shows that the course of chemical reactions are the same as the fully hydroxylated  $\text{SiO}_2$  surface. (a) Shows the initial configuration of physisorbed precursor  $\text{Mo}(\text{NMe}_2)_2(\text{N}^t\text{Bu})_2$ . The Lewis basicity of the terminal SH and Lewis acidity of  $\text{MoX}_2\text{Y}_2$  is not strong enough to gives rise to chemical adsorption of precursor which is similar to the equivalent introduction of  $\text{Mo}(\text{NMe}_2)_2(\text{N}^t\text{Bu})_2$  to the terminal OH group at the fully hydroxylated  $\text{SiO}_2$  (0001) surface (b) Shows the protonated precursor. Proton transfer to dimethylamido ligands gives rise to chemical adsorption of the physisorbed precursor. The picture of chemical adsorption of  $\text{Mo}(\text{NMe}_2)_2(\text{N}^t\text{Bu})_2$  on the terminal SH group at the  $\text{SiO}_2$  surface is the same as adsorption of  $\text{Mo}(\text{NMe}_2)_2(\text{N}^t\text{Bu})_2$  on the terminal OH group at the  $\text{SiO}_2$  surface. The described picture is in contrast to the common knowledge of chemical adsorption of metal precursors and subsequent protonation of ligands. The bond length between Mo and N is increased from 2.06 Å to 2.46 Å. This reaction is exothermic by 1.13 eV. (c) Desorption of first dimethylamine as protonated ligand. This reaction is endothermic by 0.22 eV.

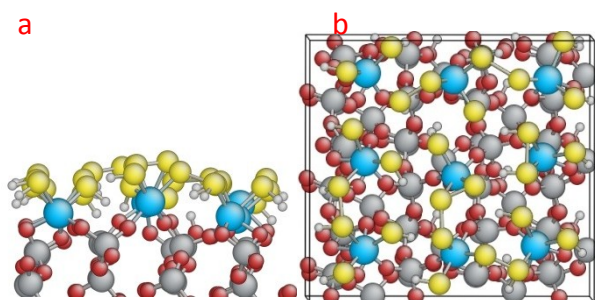

Figure S2. Formation of the buffer-layer at the interface by the cyclical reactions of ALD. (a) Shows the side view of the formed layer at the top of fully hydroxylated  $\text{SiO}_2$  (0001) surface. Mo atoms covalently bond to 3 O at the  $\text{SiO}_2$  surface and 3 S at the top layer, while S atoms covalently bond to Mo or neighboring S. Hence, Mo has coordination number (c.n.) of 6 while S has either 1 c.n. or 2 c.n. (excluding H). (b) Shows the top view of the formed layer. 9 Mo and accordingly 27 S are being optimized at the  $\text{SiO}_2$  (0001) surface. These numbers are considered according to the course of ALD reactions which terminated to 6 coordinated Mo at the interface. Considering higher number of Mo in the surface area leads to the formation of low coordinated Mo at the interface. Such morphology at the interface is not fully optimized and does not follow the course of ALD reactions.

**Table 1. Adsorption energies of  $\text{MoX}_2\text{Y}_2$  and activation energy of proton transfer for different OH-coverages, the vdW functionals (opt) is included here. The ‘optPBE-vdW’ has been chosen to treat the reaction energy of ALD reactions. The inclusion of vdW interaction makes the adsorption more favorable.**

| Reaction                                                                                                                                  | OH-coverage             | $\Delta E$ (eV) | $\Delta G^{500\text{K}}(\Delta G^{298\text{K}})$ (eV) | Reactive site involved in reaction |
|-------------------------------------------------------------------------------------------------------------------------------------------|-------------------------|-----------------|-------------------------------------------------------|------------------------------------|
| 1. $\text{MoX}_2\text{Y}_2(\text{g}) \rightarrow \text{MoX}_2\text{Y}_2^*$                                                                | 2 ML O and 2 ML H       | -0.72           | +1.01 (+0.25)                                         | Terminal OH                        |
| 2. $\text{MoX}_2\text{Y}_2(\text{g}) \rightarrow \text{MoX}_2\text{Y}_2^*$                                                                | 1.75 ML O and 1.50 ML H | -1.03           | +0.70 (-0.05)                                         | Terminal OH                        |
| 3. $\text{MoX}_2\text{Y}_2(\text{g}) + 2\text{OH}(\text{s}) \rightarrow \text{MoH}_2\text{X}_2\text{Y}_2(\text{s}) + 2\text{O}(\text{s})$ | 1.75 ML O and 1.50 ML H | -4.45           | -1.72(-3.46)                                          | Terminal O                         |
| 4. $\text{MoX}_2\text{Y}_2^* + \text{OH}(\text{s}) \rightarrow \text{MoHX}_2\text{Y}_2(\text{s}) + \text{O}(\text{s})$                    | 2 ML O and 2 ML H       | +0.15           | +1.89 (+1.14)                                         | Terminal OH                        |
| 5. $\text{MoHX}_2\text{Y}_2(\text{s}) + \text{OH}(\text{s}) \rightarrow \text{MoH}_2\text{X}_2\text{Y}_2(\text{s}) + \text{O}(\text{s})$  | 2 ML O and 2 ML H       | -0.12           | ---                                                   | Terminal OH                        |
| 6. $\text{MoX}_2\text{Y}_2^* + \text{OH}(\text{s}) \rightarrow \text{MoHX}_2\text{Y}_2^* + \text{O}(\text{s})$                            | 1.75 ML O and 1.50 ML H | -0.01           | +1.72 (+0.96)                                         | Terminal OH                        |
| 7. $\text{MoHX}_2\text{Y}_2^* \rightarrow \text{MoHX}_2\text{Y}_2(\text{s})$                                                              | 1.75 ML O and 1.50 ML H | -0.60           | +1.13 (+0.38)                                         | Terminal O                         |
| 8. $\text{MoHX}_2\text{Y}_2(\text{s}) + \text{OH}(\text{s}) \rightarrow \text{MoH}_2\text{X}_2\text{Y}_2(\text{s}) + \text{O}(\text{s})$  | 1.75 ML O and 1.50 ML H | -0.17           | ---                                                   | Terminal OH                        |
| 9. $\text{MoXY}_2(\text{s}) + \text{OH}(\text{s}) \rightarrow \text{MoHXY}_2(\text{s}) + \text{O}(\text{s})$                              | 2 ML O and 2 ML H       | -0.08           | ---                                                   | Terminal OH                        |
| 10. $\text{MoY}_2(\text{s}) + \text{OH}(\text{s}) \rightarrow \text{MoHY}_2 + \text{O}(\text{s})$                                         | 2 ML O and 2 ML H       | -0.23           | ---                                                   | Terminal OH                        |
| 11. $\text{MoY}_2(\text{s}) + \text{OH}(\text{s}) \rightarrow \text{MoHY}_2 + \text{O}(\text{s})$                                         | 1.75 ML O and 1.50 ML H | -1.79           | ---                                                   | Bridging OH                        |
| 12. $\text{MoY}_2(\text{s}) + \text{OH}(\text{s}) \rightarrow \text{MoHY}_2 + \text{O}(\text{s})$                                         | 1.75 ML O and 1.50 ML H | +0.45           | ---                                                   | Terminal OH                        |
| 13. $\text{O}(\text{s}) + \text{OH}(\text{s}) \rightarrow \text{OH}(\text{s}) + \text{O}(\text{s})$                                       | 1.75 ML O and 1.50 ML H | -2.16           | ---                                                   | Bridging OH                        |

\* Shows the physisorbed precursor. Gibbs free energy  $\Delta G$  are given in two different temperatures  $T = 500$  K and  $T = 298.15$  K (in parenthesis).

**Table 2. Activation energy and reaction energy of H<sub>2</sub>S adsorption, H<sub>2</sub>S dissociation, and desorption of protonated ligands. The inclusion of vdW interaction makes the adsorption more favorable and the desorption more unfavorable.**

| Reaction                                                                                                                                      | OH-coverage             | $\Delta E$ (eV) | $\Delta G^{500K}(\Delta G^{298K})$ (eV) | Initial c.n. of Mo |
|-----------------------------------------------------------------------------------------------------------------------------------------------|-------------------------|-----------------|-----------------------------------------|--------------------|
| 1. $\text{MoH}_2\text{X}_2\text{Y}_2(\text{s}) \rightarrow \text{MoHXY}_2(\text{s}) + \text{HX}(\text{g})$                                    | 2 ML O and 2 ML H       | +0.06           | -1.30 (-0.70)                           | c.n.=5             |
| 2. $\text{MoHXY}_2(\text{s}) \rightarrow \text{MoY}_2(\text{s}) + \text{HX}(\text{g})$                                                        | 2 ML O and 2 ML H       | +0.93           | -0.43 (+0.17)                           | c.n.=4             |
| 3. $\text{MoH}_2\text{X}_2\text{Y}_2(\text{s}) \rightarrow \text{MoHXY}_2(\text{s}) + \text{HX}(\text{g})$                                    | 1.75 ML O and 1.50 ML H | +0.67           | -0.69 (-0.09)                           | c.n.=5             |
| 4. $\text{MoHXY}_2(\text{s}) \rightarrow \text{MoY}_2(\text{s}) + \text{HX}(\text{g})$                                                        | 1.75 ML O and 1.50 ML H | +1.19           | -0.16 (+0.43)                           | c.n.=4             |
| 5. $\text{MoHY}_2(\text{s}) + \text{H}_2\text{S}(\text{g}) \rightarrow \text{MoHY}_2(\text{s}) + \text{H}_2\text{S}(\text{s})$                | 2 ML O and 2 ML H       | -0.55           | +0.59 (+0.07)                           | c.n.=5             |
| 6. $\text{MoHY}_2(\text{s}) + \text{H}_2\text{S}(\text{g}) \rightarrow \text{MoH}_2\text{Y}_2(\text{s}) + \text{SH}(\text{s})$                | 2 ML O and 2 ML H       | -0.50           | +0.63 (+0.12)                           | c.n.=5             |
| 7. $\text{MoY}_2(\text{s}) + \text{H}_2\text{S}(\text{g}) \rightarrow \text{MoY}_2(\text{s}) + \text{H}_2\text{S}(\text{s})$                  | 1.75 ML O and 1.50 ML H | -0.40           | +0.73 (+0.22)                           | c.n.=4             |
| 8. $\text{MoHY}_2(\text{s}) + \text{H}_2\text{S}(\text{g}) \rightarrow \text{MoHY}_2(\text{s}) + \text{H}_2\text{S}(\text{s})$                | 1.75 ML O and 1.50 ML H | -0.04           | +1.10 (+0.59)                           | c.n.=4             |
| 9. $\text{MoY}_2(\text{s}) + \text{H}_2\text{S}(\text{g}) \rightarrow \text{MoHY}_2(\text{s}) + \text{SH}(\text{s})$                          | 1.75 ML O and 1.50 ML H | -0.33           | +0.81 (+0.29)                           | c.n.=4             |
| 10. $\text{MoH}_3\text{Y}_2(\text{s}) \rightarrow \text{MoHY}(\text{s}) + \text{H}_2\text{Y}(\text{g})$                                       | 2 ML O and 2 ML H       | +0.49           | -0.97 (-0.33)                           | c.n.=6             |
| 11. $\text{MoHY}(\text{s}) + \text{H}_2\text{S}(\text{g}) \rightarrow \text{MoH}_2\text{Y}(\text{s}) + \text{H}_2\text{S}^*$                  | 2 ML O and 2 ML H       | -0.30           | +0.84 (+0.32)                           | c.n.=5             |
| 12. $\text{MoHY}(\text{s}) + \text{H}_2\text{S}(\text{g}) \rightarrow \text{MoH}_2\text{Y}(\text{s}) + \text{SH}(\text{s})$                   | 2 ML O and 2 ML H       | +0.15           | +1.30 (+0.78)                           | c.n.=5             |
| 13. $\text{MoH}_2\text{Y}(\text{s}) \rightarrow \text{Mo}(\text{s}) + \text{H}_2\text{Y}(\text{g})$                                           | 2 ML O and 2 ML H       | +0.97           | -0.49 (+0.15)                           | c.n.=6             |
| 14. $\text{MoH}_2\text{Y}(\text{s}) + \text{H}_2\text{S}(\text{g}) \rightarrow \text{MoH}_2\text{Y}(\text{s}) + \text{H}_2\text{S}(\text{s})$ | 2 ML O and 2 ML H       | -0.02           | +1.12 (+0.60)                           | c.n.=6             |
| 15. $\text{MoH}_2\text{Y}(\text{s}) \rightarrow \text{Mo}(\text{s}) + \text{H}_2\text{Y}(\text{g})$                                           | 2 ML O and 2 ML H       | -0.80           | -2.27 (-1.63)                           | c.n.=7             |
| 16. $\text{H}_2\text{S}^* + \text{OH}(\text{s}) \rightarrow \text{SH}(\text{s}) + \text{OH}(\text{s})$                                        | 2 ML O and 2 ML H       | -0.90           | ---                                     | ---                |

\* Shows the physisorbed precursor. Gibbs free energy  $\Delta G$  are given in two different temperatures  $T = 500$  K and  $T = 298.15$  K (in parenthesis).
